# Supplementary material for: Dynamic charge transfer through Fermi level equilibration in the p-CuFe2O4/n-NiAl LDH interface towards photocatalytic application
Source: Royal Society of Chemistry journal article supplement (doi:10.1039/d0cy00980f), 2020-01-01
Supplement: d0cy00980f1.pdf [file d0cy00980f1.pdf]

### Supporting Information

**Title:** Dynamic Charge transfer through Fermi Level Equilibration in p-CuFe<sub>2</sub>O<sub>4</sub>/  
n-NiAl LDH interface towards photocatalytic application

**Snehaprava Das, SulagnaPatnaik and K. M. Parida\***

**Center for Nano Science and Nano Technology SOA Deemed to be University, Bhubaneswar-  
751030,Odisha(India)**

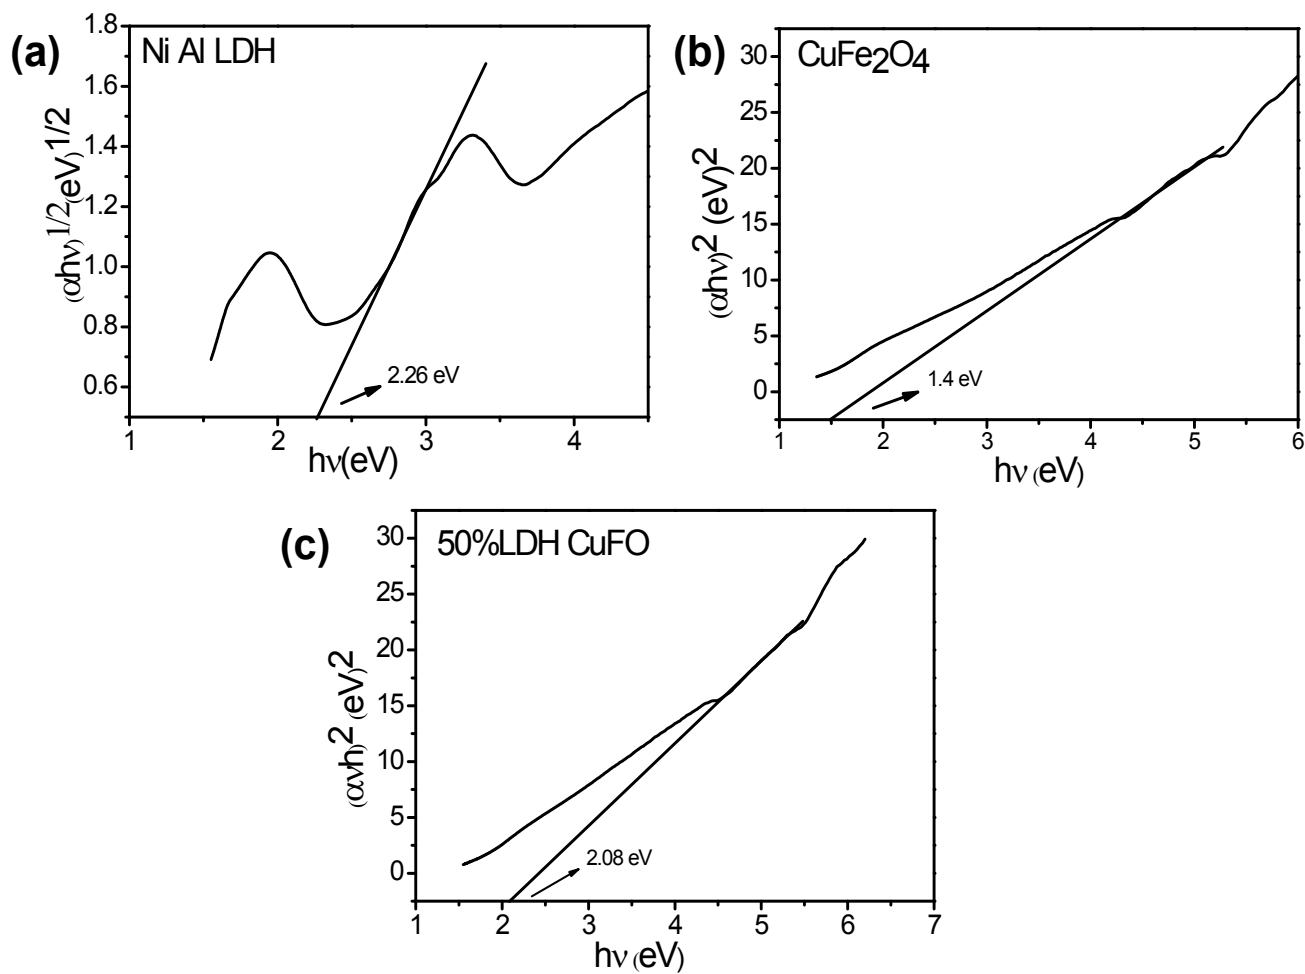

**Fig. S1** Band gap energy values assessed from UV-vis DRS of (a) neat Ni Al LDH, (b) CuFO, and (c) 50% LDH-CuFO

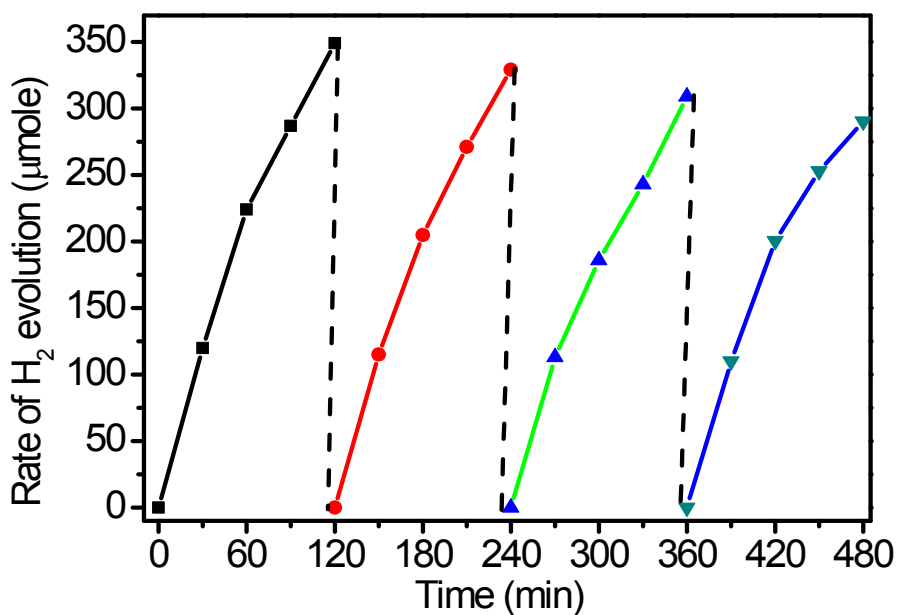

**Fig. S2** Reusability test of the photocatalyst towards H<sub>2</sub> production after four successive cycles in 60 min interval with catalyst 50% LDH-CuFO

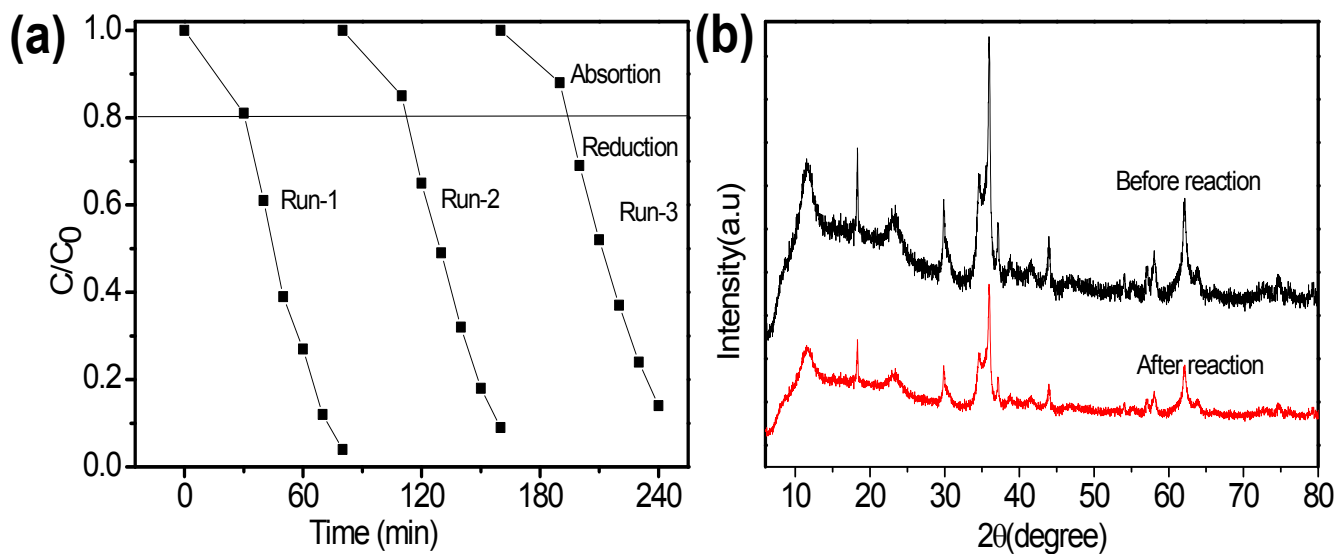

**Fig. S3** Reusability test of the photocatalyst towards (a) Cr (VI) reduction in 60 min. (b) XRD after reaction.

**Table S1:** Rate constant (k) and Regression co-efficient ( $R^2$ ) values of the synthesized samples in Cr (VI) reduction

| Photocatalyst             | Rate Constant(k) | $R^2$  |
|---------------------------|------------------|--------|
| Ni Al LDH                 | 0.01229          | 0.9638 |
| $\text{CuFe}_2\text{O}_4$ | 0.00359          | 0.9520 |
| 40% LDH-CuFO              | 0.01821          | 0.9856 |
| 50%LDH-CuFO               | 0.04464          | 0.9912 |
| 60%LDH-CuFO               | 0.01484          | 0.9849 |

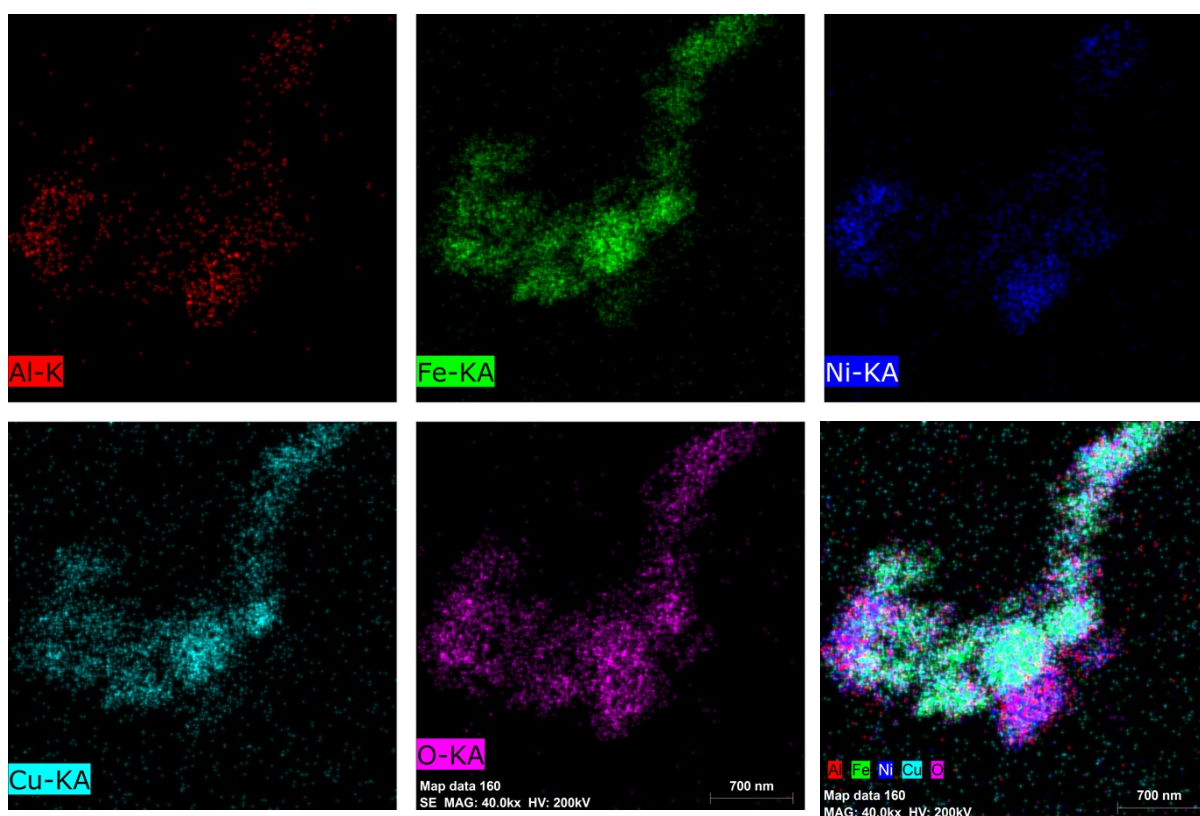

**Fig. S4** Colour elemental mapping of 50% LDH-CuFO

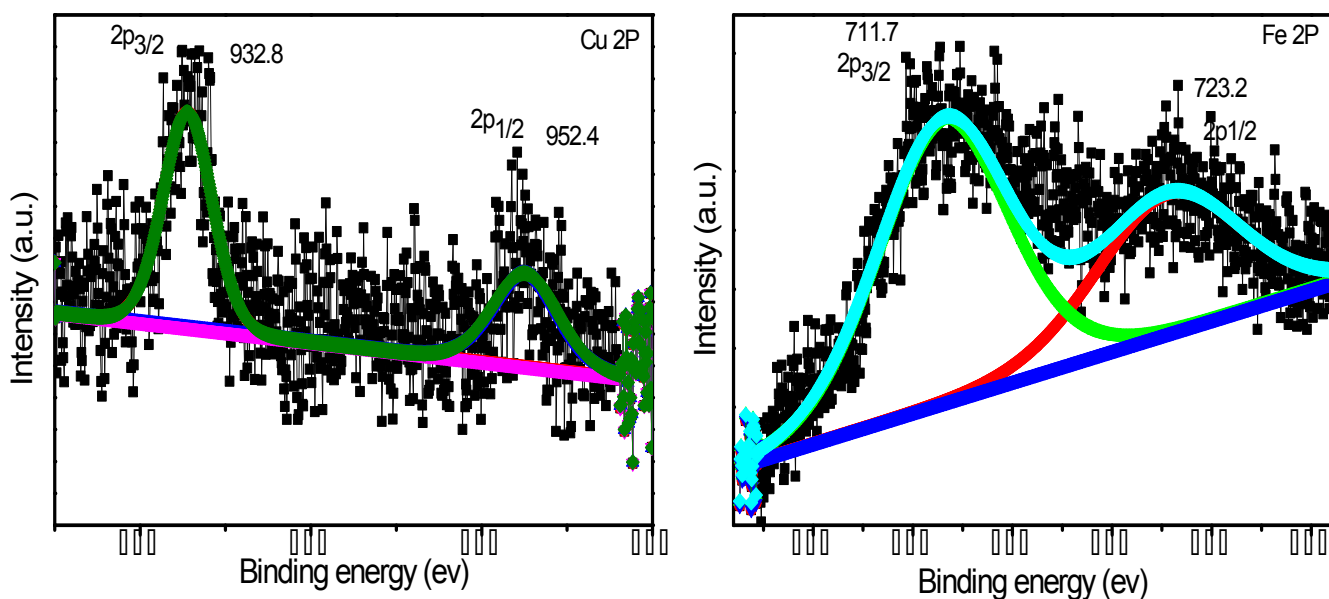

Fig. S5 XPS spectra of 50% LDH-CuFO after photocatalytic experiment.

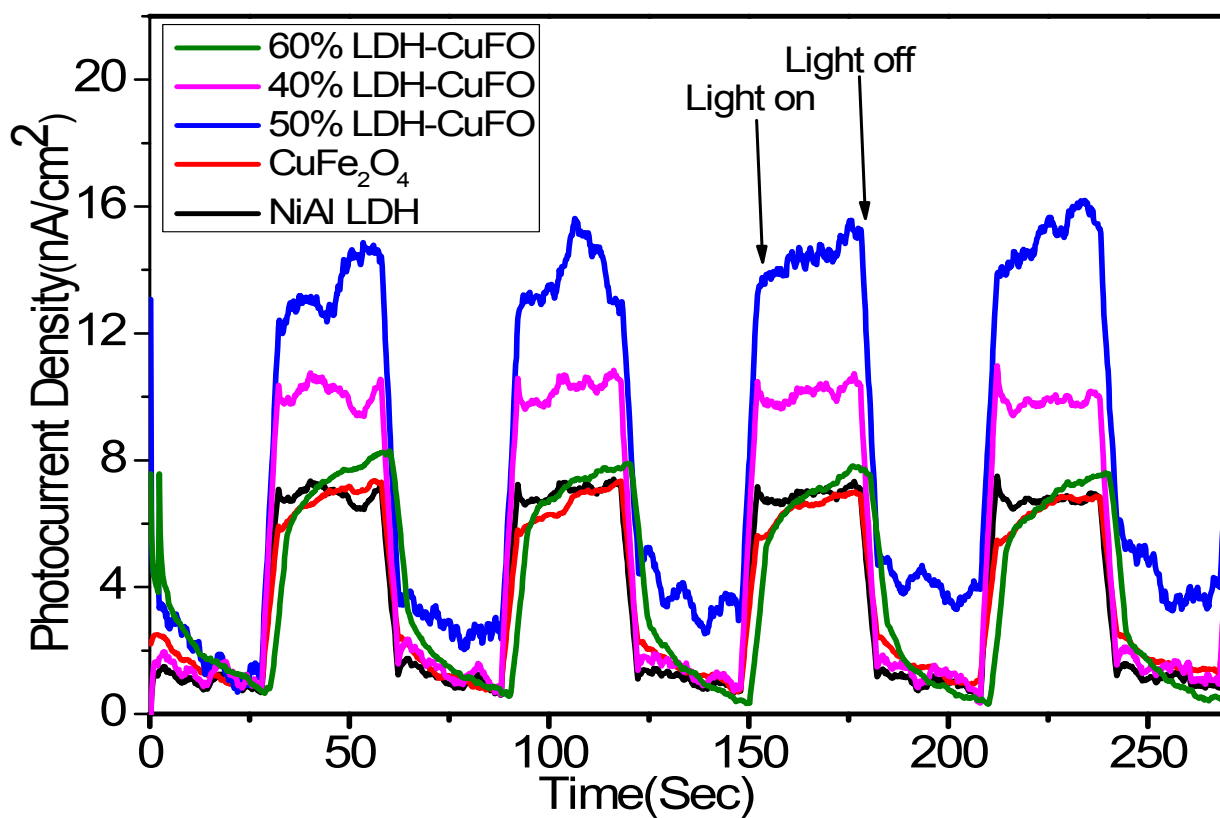

Fig. S6 Transient photocurrent study of NiAl LDH,  $\text{CuFe}_2\text{O}_4$  and X% LDH-CuFO .

| Catalytic system | Concentration of | Light | Preparation | Catalytic | pH | Results | Refs |
|------------------|------------------|-------|-------------|-----------|----|---------|------|
|------------------|------------------|-------|-------------|-----------|----|---------|------|

| Catalytic system                                             | UV-vis light Source | Preparation Method   | Incident light | Sacrificial agents                                 | H <sub>2</sub> evolution (μ mol g <sup>-1</sup> h <sup>-1</sup> ) | Ref.         |
|--------------------------------------------------------------|---------------------|----------------------|----------------|----------------------------------------------------|-------------------------------------------------------------------|--------------|
| CdS/ZnCr LDH                                                 | 450 W Xenon         | Exfoliation          | λ > 420        | Na <sub>2</sub> SO <sub>3</sub> +Na <sub>2</sub> S | 374                                                               | 1            |
| FeMgAl LDH                                                   | 125 W mercury       | Coprecipitation      | λ > 420        | CH <sub>3</sub> OH                                 | 493                                                               | 2            |
| NiZnCr LDH                                                   | 125 W mercury       | Coprecipitation      | λ > 420        | CH <sub>3</sub> OH                                 | 1915                                                              | 3            |
| Zn <sub>x</sub> Cd <sub>1-x</sub> S nanosheet/<br>ZnCdAl LDH | 300W Xenon          | Impregnation         | λ > 420        | Na <sub>2</sub> S/Na <sub>2</sub> SO <sub>3</sub>  | 6690                                                              | 4            |
| NiCo LDH/p doped CdS                                         | 300W Xenon          | In-situ hydrothermal | λ > 420        | Na <sub>2</sub> S/Na <sub>2</sub> SO <sub>3</sub>  | 8665                                                              | 5            |
| CdS/NiFe LDH                                                 | 300W Xenon          | In-situ growth       | λ > 420        | CH <sub>3</sub> OH                                 | 469                                                               | 6            |
| Ni Al LDH/CuFe <sub>2</sub> O <sub>4</sub>                   | 125 W mercury       | Coprecipitation      | λ > 420        | CH <sub>3</sub> OH                                 | 15385                                                             | Present work |

**Table S2:** Comparison of H<sub>2</sub> Evolution values by Different LDH-modified Nano composites

**Table S3:** A comparative study of Cr(VI) reduction at different pH over heterostructure 50% NiAl LDH-CuFO with other reported material

|                                                        | Cr(VI) | source         | method                               | activity time(h) |     | (%) |              |
|--------------------------------------------------------|--------|----------------|--------------------------------------|------------------|-----|-----|--------------|
| FeOOH/RGO                                              | 10 ppm | Visible light  | in situ hydrothermal                 | 3                | 2   | 94  | 7            |
| MnO <sub>2</sub> @RGO                                  | 10 ppm | Visible light  | in situ hydrothermal                 | 2                | 2   | 97  | 8            |
| Formate ion containing g-C <sub>3</sub> N <sub>4</sub> | 20ppm  | Visible light  | in situ hydrothermal                 | 4                | 5   | 55  | 9            |
| 50% NiAl LDH-CuFe <sub>2</sub> O <sub>4</sub>          | 20ppm  | Visible lights | Co-Precipitation followed by sol gel | 1                | 5.2 | 93  | Present work |

## References

- 1 G. Zhang, B. Lin, W. Yang, S. Jiang, Q. Yao, Y. Chen, B. Gao, *RSC Adv.*, 2015, **5**(8), 5823-5829.
2. K. Parida, M. Satpathy, L. Mohapatra, *J. Mater. Chem.* 2012, **22**(15), 7350-7.
3. N. Baliarsingh, L. Mohapatra, K. Parida, *J. Mater. Chem. A.* 2013, **1**(13), 4236-43
4. J. Shi, IU. Islam, W. Chen, F. Wang, Z. Xu, S. Xu, Y. Li, J. Lu, *Inter. J. Hydrog. Energy*, 2018, **43**(42), 19481-91.
5. S.Li, L. Wang, Y. Li, L. Zhang, A. Wang, N. Xiao, Y. Gao, N. Li, W. Song, L. Ge, J. Liu, *Appl. Catal. B: Environ.*, 2019, **254**,145-55.
6. R. Boppella, C.H. Choi, J. Moon, D.H. Kim, *Appl. Catal. B: Environ.*, 2018, **239**,178-86.
7. D.K. Padhi, K. Parida., *J. Mater. Chem. A* , 2014, **2**(26), pp.10300-10312.
8. D.K. Padhi, A. Baral, K. Parida, S.K. Singh, M.K Ghosh, *J. Phys. Chem. C.* 2017, **121**(11),6039-49.
9. G. Dong, L. Zhang, *J. Phys. Chem. C.*, 2013;**117**(8),4062-8.
